# Supplementary material for: Metabolites of De Novo Purine Synthesis: Metabolic Regulators and Cytotoxic Compounds
Source: MDPI journal article supplement (doi:10.3390/metabo12121210), 2022-12-02
Supplement: s1 [file s1]

**Table S1:** Selected reaction monitoring (SRM) of DNPS metabolites

| STANDARD     |       |       | Treatment with<br><sup>13</sup> C <sub>2</sub> - FGAR |       |       | Treatment with<br><sup>13</sup> C <sub>2</sub> , <sup>15</sup> N - AIR |       |       | Treatment with<br><sup>13</sup> C <sub>2</sub> , <sup>15</sup> N <sub>2</sub> - SAICAR |       |       | Treatment with<br><sup>13</sup> C <sub>2</sub> , <sup>15</sup> N <sub>2</sub> - AICAR |       |       |
|--------------|-------|-------|-------------------------------------------------------|-------|-------|------------------------------------------------------------------------|-------|-------|----------------------------------------------------------------------------------------|-------|-------|---------------------------------------------------------------------------------------|-------|-------|
| name         | MS1   | MS2   | name                                                  | MS1   | MS2   | name                                                                   | MS1   | MS2   | name                                                                                   | MS1   | MS2   | name                                                                                  | MS1   | MS2   |
| GAR          | 287.1 | 75.1  | <sup>13</sup> C <sub>2</sub> -GAR                     | 289.1 | 77.1  | <sup>13</sup> C <sub>2</sub> -GAR                                      | 289.1 | 77.1  |                                                                                        |       |       |                                                                                       |       |       |
| GAr          | 207.1 | 75.1  | <sup>13</sup> C <sub>2</sub> -GAr                     | 209.1 | 77.1  | <sup>13</sup> C <sub>2</sub> -GAr                                      | 209.1 | 77.1  |                                                                                        |       |       |                                                                                       |       |       |
| FGAR         | 315.1 | 103   | <sup>13</sup> C <sub>2</sub> -FGAR                    | 317.1 | 105   | <sup>13</sup> C <sub>2</sub> -FGAR                                     | 317.1 | 105   |                                                                                        |       |       |                                                                                       |       |       |
| FGAr         | 235.1 | 103.1 | <sup>13</sup> C <sub>2</sub> -FGAr                    | 237.1 | 105.1 | <sup>13</sup> C <sub>2</sub> -FGAr                                     | 237.1 | 105.1 |                                                                                        |       |       |                                                                                       |       |       |
| FGAMR        | 314.2 | 102.1 | <sup>13</sup> C <sub>2</sub> -FGAMR                   | 316.2 | 104.1 |                                                                        |       |       |                                                                                        |       |       |                                                                                       |       |       |
| FGAMr        | 234.1 | 102.1 | <sup>13</sup> C <sub>2</sub> -FGAMr                   | 236.1 | 104.1 |                                                                        |       |       |                                                                                        |       |       |                                                                                       |       |       |
| AIR          | 296.2 | 84    | <sup>13</sup> C <sub>2</sub> -AIR                     | 298.2 | 86    | <sup>13</sup> C <sub>2</sub> , <sup>15</sup> N-AIR                     | 299.2 | 87    |                                                                                        |       |       |                                                                                       |       |       |
| AIr          | 216.2 | 84    | <sup>13</sup> C <sub>2</sub> -AIr                     | 218.2 | 86    | <sup>13</sup> C <sub>2</sub> , <sup>15</sup> N-AIr                     | 219.2 | 87    |                                                                                        |       |       |                                                                                       |       |       |
| CAIR         | 340.2 | 128.2 | <sup>13</sup> C <sub>2</sub> -CAIR                    | 342.2 | 130.2 | <sup>13</sup> C <sub>2</sub> , <sup>15</sup> N-CAIR                    | 343.1 | 131.2 |                                                                                        |       |       |                                                                                       |       |       |
|              | 340.2 | 110.2 |                                                       |       |       | <sup>13</sup> C <sub>2</sub> -CAIR                                     | 342.1 | 130.2 |                                                                                        |       |       |                                                                                       |       |       |
| CAIr         | 260.2 | 128.2 | <sup>13</sup> C <sub>2</sub> -CAIr                    | 262.2 | 130.2 | <sup>13</sup> C <sub>2</sub> , <sup>15</sup> N-CAIr                    | 263.1 | 131.2 |                                                                                        |       |       |                                                                                       |       |       |
| SAICAR       | 455.2 | 243.0 | <sup>13</sup> C <sub>2</sub> -SAICAR                  | 457.2 | 245.0 | <sup>13</sup> C <sub>2</sub> , <sup>15</sup> N-SAICAR                  | 458.2 | 246.0 | <sup>13</sup> C <sub>2</sub> , <sup>15</sup> N <sub>2</sub> -SAICAR                    | 459.2 | 247.0 | <sup>13</sup> C <sub>2</sub> , <sup>15</sup> N <sub>2</sub> -SAICAR                   | 459.2 | 247.0 |
| SAICAr       | 375.2 | 243.0 | <sup>13</sup> C <sub>2</sub> -SAICAr                  | 377.2 | 245.0 | <sup>13</sup> C <sub>2</sub> , <sup>15</sup> N-SAICAr                  | 378.2 | 246.0 | <sup>13</sup> C <sub>2</sub> , <sup>15</sup> N <sub>2</sub> -SAICAr                    | 379.2 | 247.0 | <sup>13</sup> C <sub>2</sub> , <sup>15</sup> N <sub>2</sub> -SAICAr                   | 379.2 | 247.0 |
| AICAR        | 339.2 | 110.2 | <sup>13</sup> C <sub>2</sub> -AICAR                   | 341.2 | 112.2 | <sup>13</sup> C <sub>2</sub> , <sup>15</sup> N-AICAR                   | 342.2 | 113.2 | <sup>13</sup> C <sub>2</sub> , <sup>15</sup> N <sub>2</sub> -AICAR                     | 343.2 | 113.2 | <sup>13</sup> C <sub>2</sub> , <sup>15</sup> N <sub>2</sub> -AICAR                    | 343.2 | 113.2 |
|              | 339.2 | 127.2 |                                                       | 341.2 | 129.2 |                                                                        |       |       |                                                                                        | 343.2 | 131.2 |                                                                                       | 343.2 | 131.2 |
| AICAr        | 259.2 | 127.2 | <sup>13</sup> C <sub>2</sub> -AICAr                   | 261.2 | 129.2 | <sup>13</sup> C <sub>2</sub> , <sup>15</sup> N-AICAr                   | 262.2 | 130.2 | <sup>13</sup> C <sub>2</sub> , <sup>15</sup> N <sub>2</sub> -AICAr                     | 263.2 | 131.2 | <sup>13</sup> C <sub>2</sub> , <sup>15</sup> N <sub>2</sub> -AICAr                    | 263.2 | 131.2 |
| FAICAR       | 367.1 | 155.1 | <sup>13</sup> C <sub>2</sub> -FAICAR                  | 369.1 | 157.1 | <sup>13</sup> C <sub>2</sub> , <sup>15</sup> N-FAICAR                  | 370.1 | 158.1 |                                                                                        |       |       | <sup>13</sup> C <sub>2</sub> , <sup>15</sup> N <sub>2</sub> -FAICAR                   | 371.1 | 159.2 |
| FAICAr       | 287.2 | 138.2 | <sup>13</sup> C <sub>2</sub> -FAICAr                  | 289.2 | 140.2 | <sup>13</sup> C <sub>2</sub> , <sup>15</sup> N-FAICAr                  | 290.2 | 141.2 |                                                                                        |       |       | <sup>13</sup> C <sub>2</sub> , <sup>15</sup> N <sub>2</sub> -FAICAr                   | 291.2 | 141.1 |
|              |       |       |                                                       |       |       |                                                                        |       |       |                                                                                        |       |       |                                                                                       | 291.2 | 142.1 |
| IMP          | 349.1 | 137.0 | <sup>13</sup> C <sub>2</sub> -IMP                     | 351.1 | 139   | <sup>13</sup> C <sub>2</sub> , <sup>15</sup> N-IMP                     | 352.1 | 140   | <sup>13</sup> C <sub>2</sub> , <sup>15</sup> N <sub>2</sub> -IMP                       | 353.1 | 141   | <sup>13</sup> C <sub>2</sub> , <sup>15</sup> N <sub>2</sub> -IMP                      | 353.1 | 141   |
| inosine      | 269.0 | 137.0 | <sup>13</sup> C <sub>2</sub> -inosine                 | 271.0 | 139.0 | <sup>13</sup> C <sub>2</sub> , <sup>15</sup> N-inosine                 | 272.0 | 140.0 | <sup>13</sup> C <sub>2</sub> , <sup>15</sup> N <sub>2</sub> -inosine                   | 273.0 | 141.0 | <sup>13</sup> C <sub>2</sub> , <sup>15</sup> N <sub>2</sub> -inosine                  | 273.0 | 141.0 |
| xanthine     | 153.1 | 110.1 | <sup>13</sup> C <sub>2</sub> -xanthine                | 155.1 | 112.1 | <sup>13</sup> C <sub>2</sub> , <sup>15</sup> N-xanthine                | 156.1 | 113.1 | <sup>13</sup> C <sub>2</sub> , <sup>15</sup> N <sub>2</sub> -xanthine                  | 157.1 | 139.0 | <sup>13</sup> C <sub>2</sub> , <sup>15</sup> N <sub>2</sub> -xanthine                 | 157.1 | 139.0 |
|              | 153.1 | 136.0 |                                                       | 155.1 | 138   |                                                                        |       |       |                                                                                        |       |       |                                                                                       | 157.1 | 113.1 |
| hypoxanthine | 137.1 | 110.1 | <sup>13</sup> C <sub>2</sub> -hypoxanthine            | 139.1 | 112.1 | <sup>13</sup> C <sub>2</sub> , <sup>15</sup> N-hypoxanthine            | 140.1 | 113.1 | <sup>13</sup> C <sub>2</sub> , <sup>15</sup> N <sub>2</sub> -hypoxanthine              | 141.1 | 114.1 | <sup>13</sup> C <sub>2</sub> , <sup>15</sup> N <sub>2</sub> -hypoxanthine             | 141.1 | 114.1 |
|              | 137.1 | 119.0 |                                                       | 139.1 | 121.0 |                                                                        |       |       |                                                                                        | 141.1 | 123   |                                                                                       | 141.1 | 123   |
|              |       |       |                                                       |       |       |                                                                        |       |       |                                                                                        | 141.1 | 113.1 |                                                                                       | 141.1 | 113.1 |
| SAdo         | 384.2 | 252   | <sup>13</sup> C <sub>2</sub> -SAdo                    | 386.2 | 254   | <sup>13</sup> C <sub>2</sub> , <sup>15</sup> N-SAdo                    | 387.2 | 255.1 |                                                                                        |       |       | <sup>13</sup> C <sub>2</sub> , <sup>15</sup> N <sub>2</sub> -SAdo                     | 388.2 | 256.1 |
| SAMP         | 464.1 | 251.7 | <sup>13</sup> C <sub>2</sub> -SAMP                    | 466.1 | 253.7 | <sup>13</sup> C <sub>2</sub> , <sup>15</sup> N-SAMP                    | 467.1 | 254.7 |                                                                                        |       |       | <sup>13</sup> C <sub>2</sub> , <sup>15</sup> N <sub>2</sub> -SAMP                     | 468.1 | 255.7 |
| uric acid    | 169.3 | 141.0 | <sup>13</sup> C <sub>2</sub> -uric acid               | 171.3 | 143.0 | <sup>13</sup> C <sub>2</sub> , <sup>15</sup> N-uric acid               | 172.3 | 144.0 | <sup>13</sup> C <sub>2</sub> , <sup>15</sup> N <sub>2</sub> -uric acid                 | 173.3 | 145.0 | <sup>13</sup> C <sub>2</sub> , <sup>15</sup> N <sub>2</sub> -uric acid                | 173.3 | 145.0 |
